# Supplementary material for: Poly(vinyl alcohol) as a water protecting agent for silver nanoparticles: the role of polymer size and structure
Source: Royal Society of Chemistry journal article supplement (doi:10.1039/c6cp05562a), 2017-01-01
Supplement: c6cp05562a1.pdf [file c6cp05562a1.pdf]

## Supplementary Information

*for*

### **Poly(Vinyl Alcohol) as a Water Protecting Agent for a Silver Nanoparticle: A Role of Polymer Size and Structure**

Alexander Kyrychenko,<sup>a,b\*</sup> Dmitry A. Pasko<sup>b</sup> and Oleg N. Kalugin<sup>b</sup>

*<sup>a</sup>Institute of Chemistry, V. N. Karazin Kharkiv National University, 4 Svobody square, Kharkiv 61022, Ukraine*

*<sup>b</sup>School of Chemistry, V. N. Karazin Kharkiv National University, 4 Svobody square, Kharkiv 61022, Ukraine*

\*To whom correspondence should be addressed:

Email: [a.v.kyrychenko@karazin.ua](mailto:a.v.kyrychenko@karazin.ua)

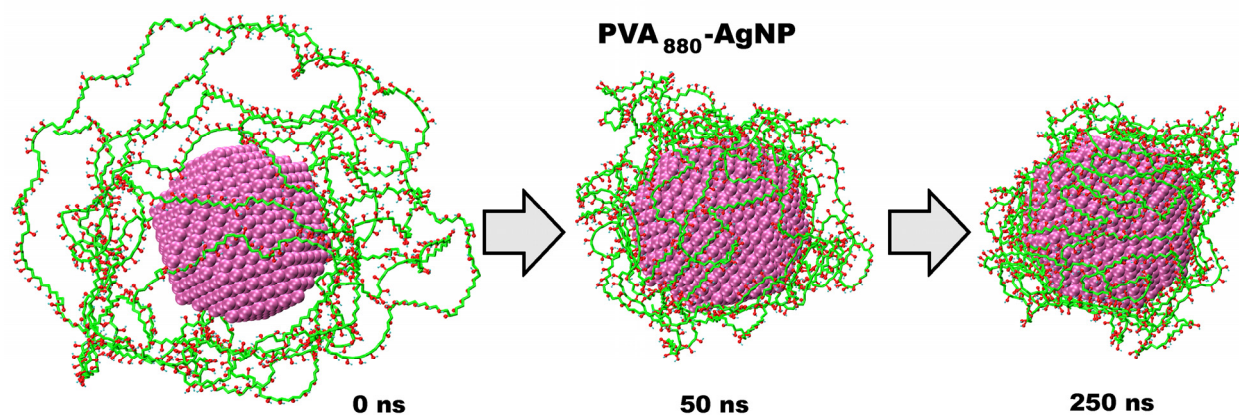

**Supplemental Figure S01. MD simulations of PVA<sub>880</sub>-AgNP.** Adsorption dynamics of PVA<sub>880</sub> onto AgNP core was simulated at the NPT ensemble. The silver atoms are shown by the van der Waals model colored in *mauve*. PVA backbone is shown in *green*. The PVA oxygen atoms are *red* balls. Water molecules and buffering ions are not shown for clarity.

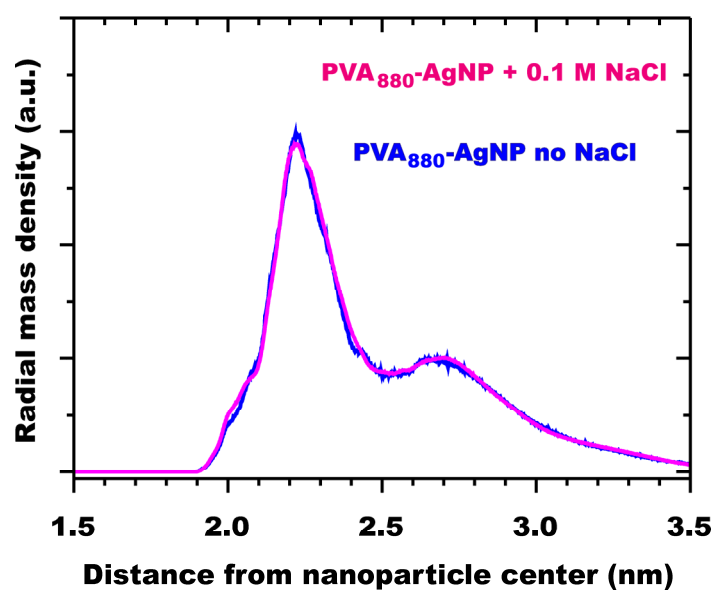

**Supplemental Figure S02.** Radial distribution functions calculated from the center-of-mass (RDF-COM) of the inorganic Ag core. The RDF-COM profiles for PVA in the absence (*blue*) and in the presence of 0.1 M buffering ions NaCl (*magenta*) reveal the similar pattern.

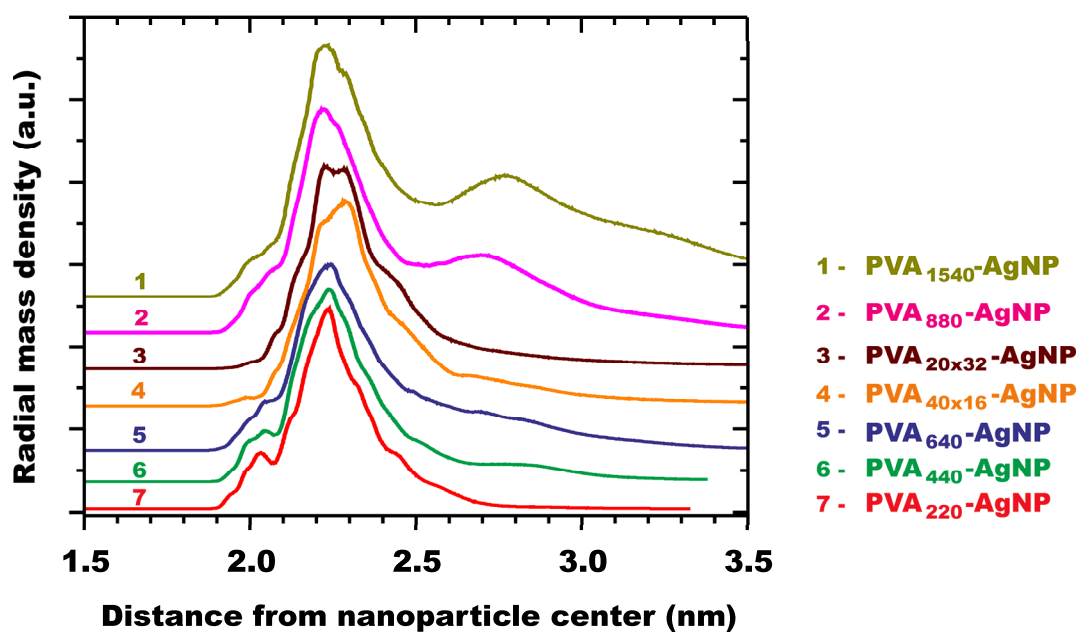

**Supplemental Figure S03.** Radial distribution functions calculated from the center-of-mass (RDF-COM) of the inorganic Ag core. The RDF-COM profiles for PVA with the different polymer size and structure show the gradual formation of multilayered coating around the Ag core upon going from PVA<sub>220</sub> up to PVA<sub>1540</sub>.

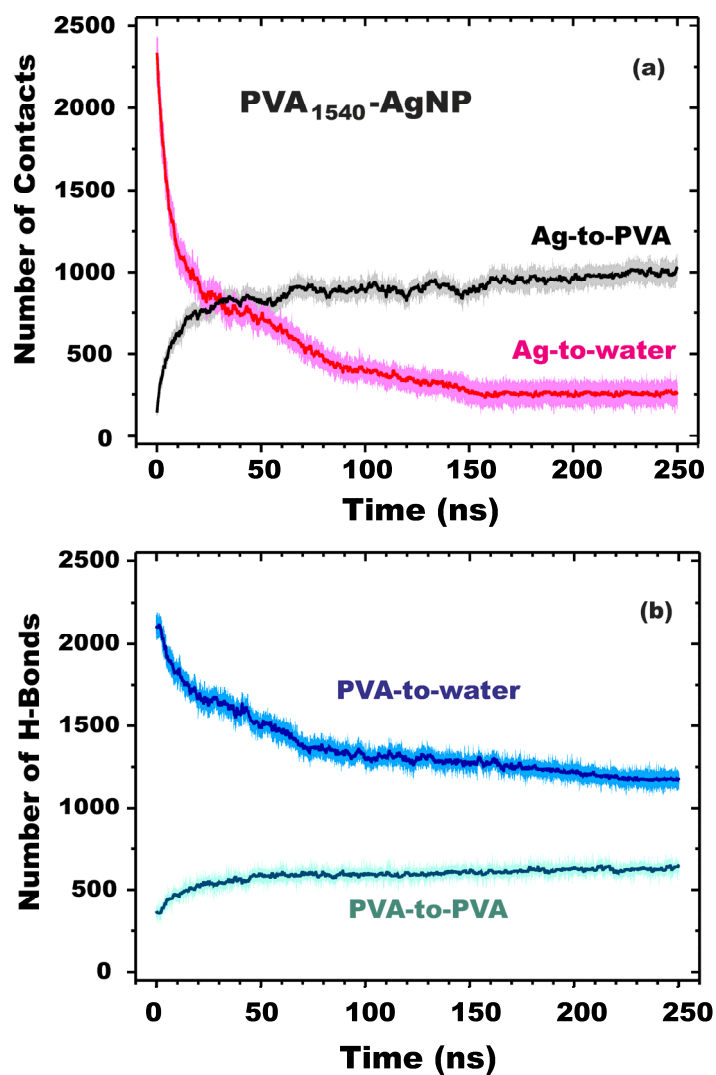

**Supplemental Figure S04.** (a) Time evolution of the number of contacts between the Ag atoms and all the PVA atoms (Ag-to-PVA), and the oxygen atoms of the water molecules (Ag-to-water) calculated for PVA<sub>1540</sub>-AgNP with the cut-off 3.5 Å. (b) Dynamics of the number of hydrogen bonds (PVA-to-water and PVA-to-PVA) calculated for PVA<sub>1540</sub>-AgNP.

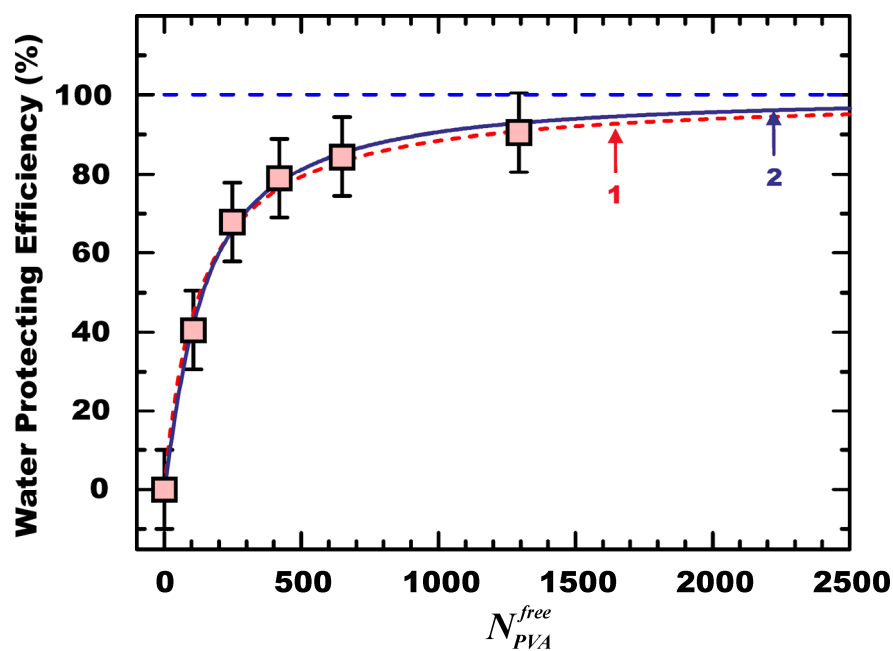

**Supplemental Figure S05. Water-protecting effect of PVA.** Plots of the water-protecting efficiency of PVA (*squares*) for AgNP as a function of the free unbound number of PVA units estimated by the MD simulation. The data are fitted by (1) Langmuir-type ( $K=7.68 \cdot 10^{-3}$ ,  $W_{max}=3200$ ) and (2) Langmuir–Freundlich-type ( $K=3.26 \cdot 10^{-3}$ ,  $n=0.86$ ,  $W_{max}=2800$ ) adsorption isotherms.
